# Supplementary material for: Experimental design for three interrelated marine ice sheet and ocean model intercomparison projects: MISMIP v. 3 (MISMIP +), ISOMIP v. 2 (ISOMIP +) and MISOMIP v. 1 (MISOMIP1)
Source: Copernicus journal article supplement (doi:10.5194/gmd-9-2471-2016), 2016-07-25
Supplement: Supplementary file 1 [file gmd-9-2471-2016-supplement.zip]

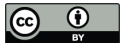

## *Supplement of*

# **Experimental design for three interrelated marine ice sheet and ocean model intercomparison projects: MISMIP v. 3 (MISMIP+), ISOMIP v. 2 (ISOMIP+) and MISOMIP v. 1 (MISOMIP1)**

**Xylar S. Asay-Davis et al.**

*Correspondence to:* Xylar S. Asay-Davis (xylar.asay-davis@pik-potsdam.de)

- gmd-9-2471-2016-supplement-title-page.pdf
- supplement
  - isomip+
    - \* Ocean0\_COM\_POP2x.pdf
    - \* Ocean1-4\_COM\_POP2x.pdf
    - \* Ocean1-4\_COM\_POP2x.tex
    - \* README
    - \* plotMISOMIPOceanData.py
    - \* plotMISOMIPOceanMetrics.py
  - mismip+
    - \* Ice0-example.nc
    - \* Ice1r-example.nc
    - \* Ice1ra-example.nc
    - \* Ice1rr-example.nc
    - \* Ice2r-example.nc
    - \* Ice2ra-example.nc
    - \* Ice2rr-example.nc
    - \* README
    - \* bisicles\_ssa\_tsai\_datasheet.pdf
    - \* mismip3d\_dma6
    - \* plot\_example.py
    - \* write\_example.py
  - misomip1
    - \* IceOcean1-2\_COM\_POPSICLES\_SSA.pdf
    - \* IceOcean1-2\_COM\_POPSICLES\_SSA.tex

- \* README
- \* plotMISOMIPIceData.py
- \* plotMISOMIPIceMetrics.py

The copyright of individual parts of the supplement might differ from the CC-BY 3.0 licence.
