# Supplementary material for: Experimental design for three interrelated marine ice sheet and ocean model intercomparison projects: MISMIP v. 3 (MISMIP +), ISOMIP v. 2 (ISOMIP +) and MISOMIP v. 1 (MISOMIP1)
Source: Copernicus journal article supplement (doi:10.5194/gmd-9-2471-2016), 2016-07-25
Supplement: Supplementary file 3 [file gmd-9-2471-2016-supplement.zip]

# Summary of Ocean0\_COM\_POP2x Results

Xylar Asay-Davis

April 16, 2016

## 1 Model Details

- Model and version: Parallel Ocean Program v. 2x (POP2x)
- Repository: not publicly available.
- Vertical coordinate:  $z$  level with partial top and bottom cells.
- Horizontal mixing: harmonic (del2) along geopotentials.
- Vertical mixing: del2 with COM constant viscosity and diffusivity.
- Advection schemes: momentum: centered, tracers: flux limited Lax-Wendroff.
- Equation of state: linear with ISOMIP+ coefficients.
- Convection parameterization: enhanced vertical mixing (ISOMIP+ values of  $\nu_{\text{unstab}}$  and  $\kappa_{\text{unstab}}$ )
- Melt parameterization:  $T_w$  and  $S_w$  are computed by averaging  $T$  and  $S$  with 20 m of the ice draft.  $u_w$  is averaged over 4 “horizontal” neighbors (at the ice-ocean interface) from the velocity to the tracer grid but is not averaged vertically.
- Modifications to Topography: Interpolated to 2-km grid with conservative interpolation scheme, smoothed with a Gaussian filter with half-width of 2 km. A minimum thickness of 2 grid cells (40 m) was maintained by deepening bathymetry near the grounding line. Partial top cells thinner than 5 m are either thickened or removed. Ice draft and bathymetry are automatically adjusted to ensure required connectivity between neighboring cells (e.g. removing or horizontally expanding cells with no horizontal neighbors).
- Maintaining sea level: Using virtual salt fluxes, so sea-level change is negligible.
- Deviations from COM: none.
- Parameter values:

|                    |                          |
|--------------------|--------------------------|
| $\Gamma_T$         | 0.11                     |
| $\Gamma_S$         | $3.14286 \times 10^{-3}$ |
| $C_{D,\text{top}}$ | $2.5 \times 10^{-3}$     |

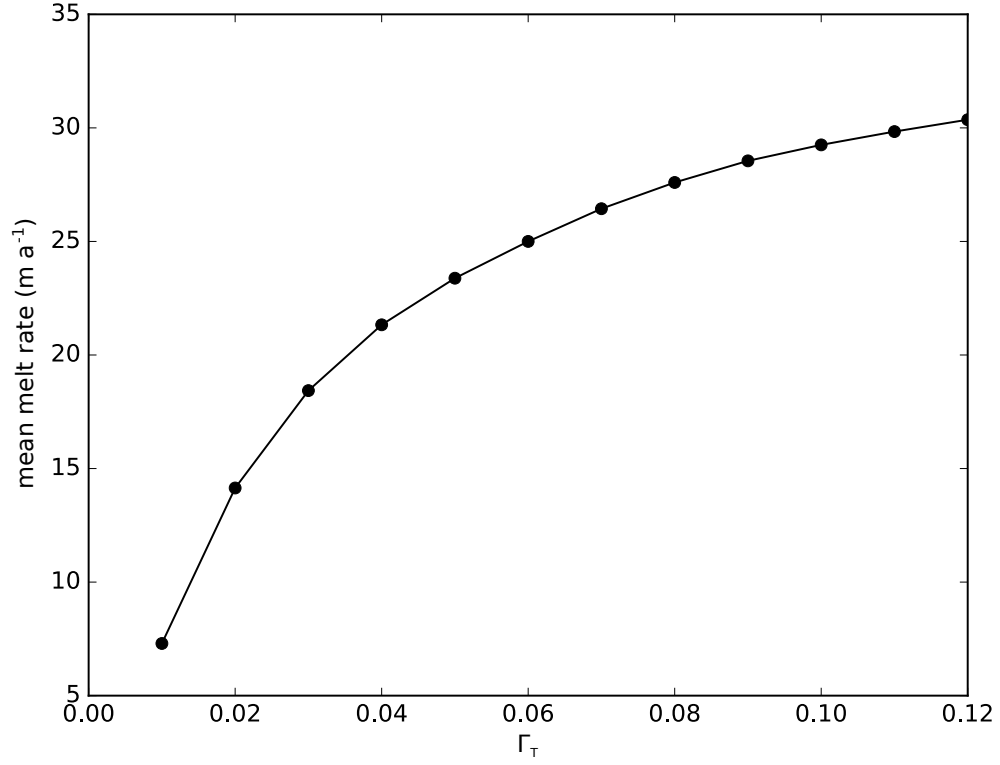

Figure 1: The dependence of the mean melt rate averaged over locations below  $z_d = -300$  m and over the final six months of the simulation for various values of the turbulent heat-transfer coefficient  $\Gamma_T$ . Based on these results, the value  $\Gamma_T \approx 0.11$ , corresponding to a mean melt rate  $m_w \approx 30 \text{ m a}^{-1}$ , was used for subsequent ISOMIP+ and MISOMIP1 simulations.
