# Supplementary material for: Experimental design for three interrelated marine ice sheet and ocean model intercomparison projects: MISMIP v. 3 (MISMIP +), ISOMIP v. 2 (ISOMIP +) and MISOMIP v. 1 (MISOMIP1)
Source: Copernicus journal article supplement (doi:10.5194/gmd-9-2471-2016), 2016-07-25
Supplement: Supplementary file 4 [file gmd-9-2471-2016-supplement.zip]

# Summary of Ocean1–4\_COM\_POP2x Results

Xylar Asay-Davis

April 16, 2016

## 1 Model Details

- Model and version: Parallel Ocean Program v. 2x (POP2x)
- Repository: not publicly available.
- Vertical coordinate:  $z$  level with partial top and bottom cells.
- Horizontal mixing: harmonic (del2) along geopotentials.
- Vertical mixing: del2 with COM constant viscosity and diffusivity.
- Advection schemes: momentum: centered, tracers: flux limited Lax-Wendroff.
- Equation of state: linear with ISOMIP+ coefficients.
- Convection parameterization: enhanced vertical mixing (ISOMIP+ values of  $\nu_{\text{unstab}}$  and  $\kappa_{\text{unstab}}$ )
- Melt parameterization:  $T_w$  and  $S_w$  are computed by averaging  $T$  and  $S$  with 20 m of the ice draft.  $u_w$  is averaged over 4 “horizontal” neighbors (at the ice–ocean interface) from the velocity to the tracer grid but is not averaged vertically.
- Modifications to Topography: Interpolated to 2-km grid with conservative interpolation scheme, smoothed with a Gaussian filter with half-width of 2 km. A minimum thickness of 2 grid cells (40 m) was maintained by deepening bathymetry near the grounding line. Partial top cells thinner than 5 m are either thickened or removed. Ice draft and bathymetry are automatically adjusted to ensure required connectivity between neighboring cells (e.g. removing or horizontally expanding cells with no horizontal neighbors).
- Maintaining sea level: Using virtual salt fluxes, so sea-level change is negligible.
- Moving boundaries (Ocean3–4): Topography data was interpolated to monthly snapshots, calving criterion was applied. After updating topography,  $T$  and  $S$  were progressively extrapolated first horizontally, then vertically into new ocean cells. Barotropic transport was maintained by re-distributing barotropic velocity across the expanded or contracted water column. Velocities are initially zero in new ocean columns.  $T$ ,  $S$  and  $v$  are simply zeroed in cells removed from the ocean.
- Deviations from COM: none.

- Parameter values:

$$\begin{array}{ll} \Gamma_T & 0.1146 \\ \Gamma_S & 3.27429 \times 10^{-3} \\ C_{D,\text{top}} & 2.5 \times 10^{-3} \end{array}$$
